# Supplementary material for: Anionic derivatives of uracil: fragmentation and reactivity
Source: Royal Society of Chemistry journal article supplement (doi:10.1039/c4cp02277g), 2014-01-01
Supplement: c4cp02277g1.pdf [file c4cp02277g1.pdf]

## Supporting Information

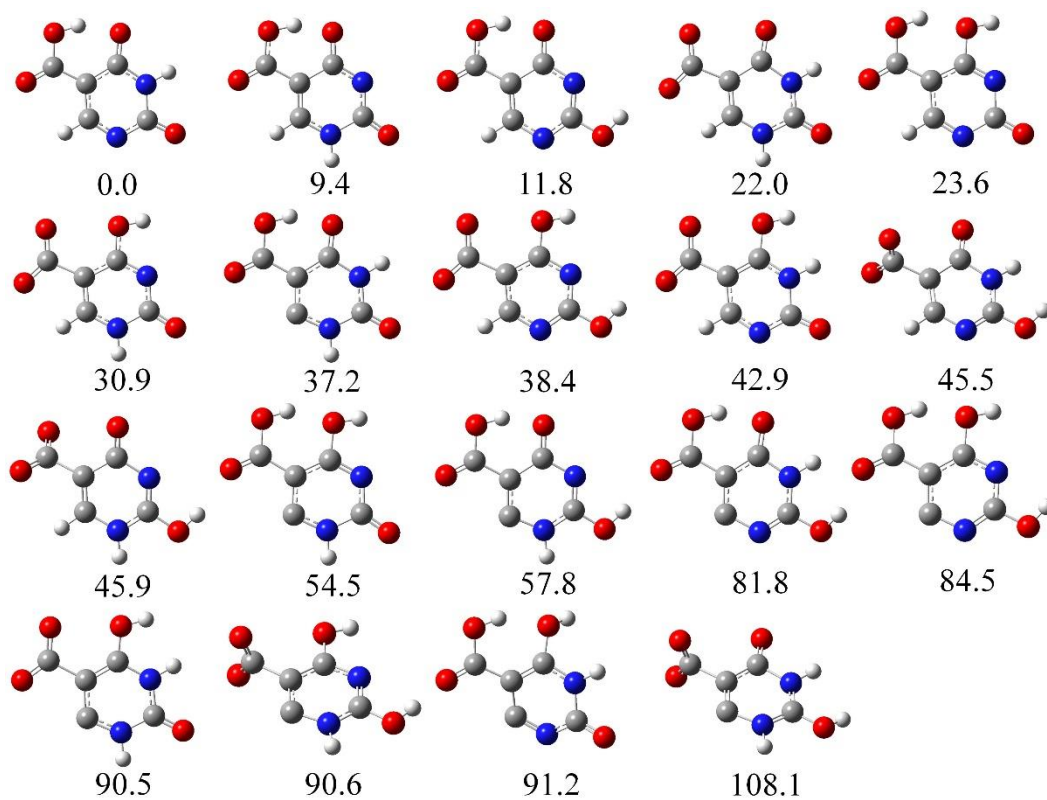

Figure S1. Isomers of  $C_5H_3N_2O_4^-$  are listed in order of increasing electronic energies (ZPE corrected) relative to the most stable isomer. These energies ( $\text{kcal mol}^{-1}$ ) are calculated at the B3LYP/6-311++G(d,p) level of theory and shown beneath each structure.

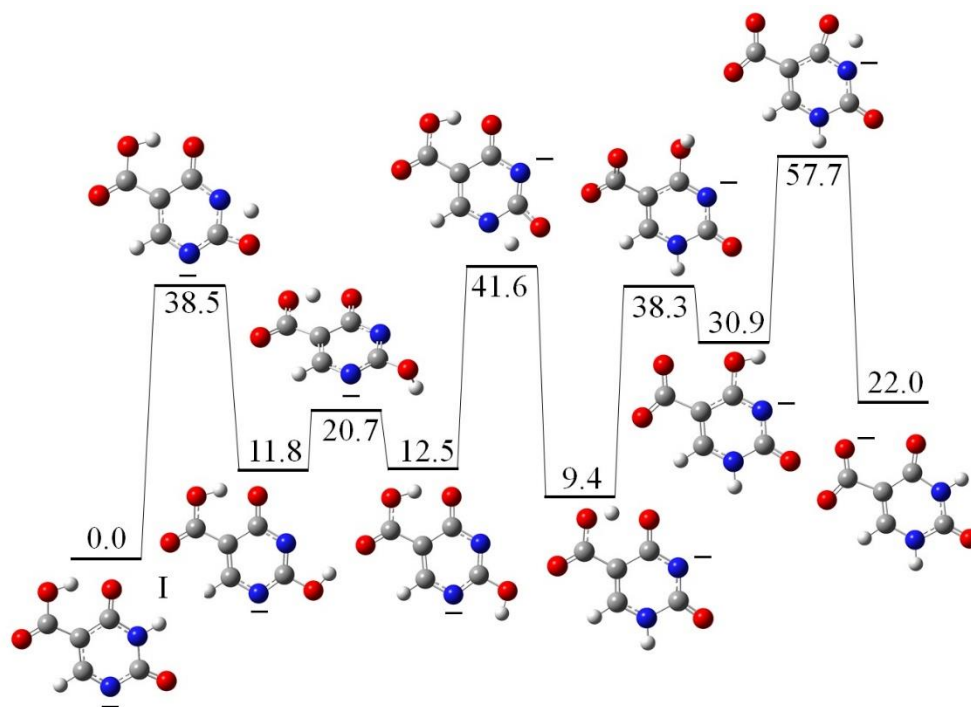

Figure S2. Tautomerization of  $C_5H_3N_2O_4^-$  involves many low energy H transfers throughout the ion. This potential energy surface (kcal mol<sup>-1</sup>) is calculated at the B3LYP/6-311++G(d,p) level of theory and displays the barriers to the conversion between several  $C_5H_3N_2O_4^-$  structures.

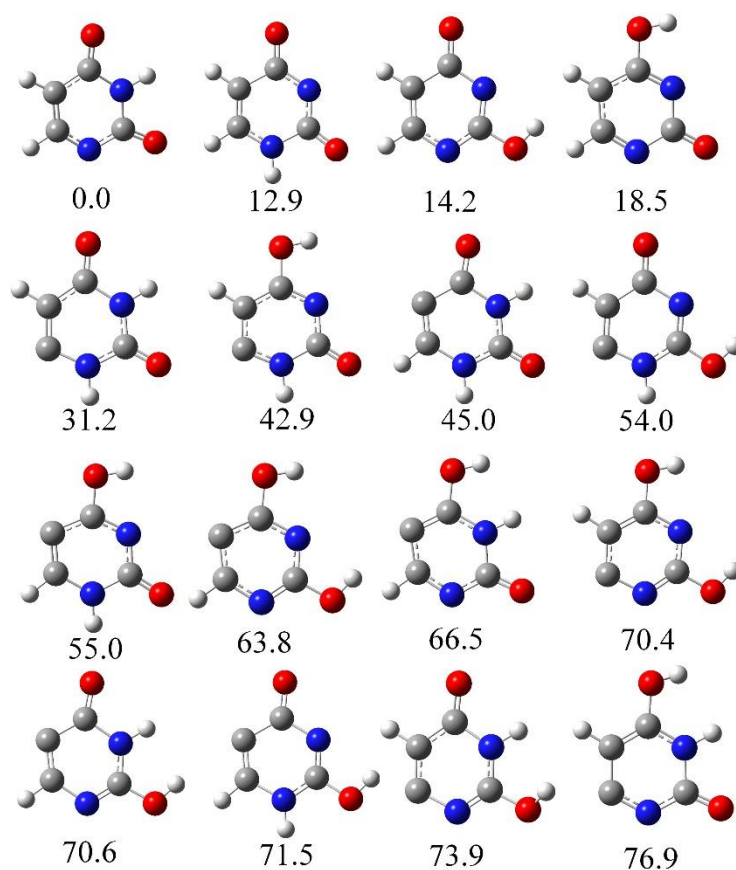

Figure S3. Isomers of  $C_4H_3N_2O_2^-$  are listed in order of increasing electronic energies (ZPE corrected) relative to the most stable isomer. These energies ( $\text{kcal mol}^{-1}$ ) are calculated at the B3LYP/6-311++G(d,p) level of theory and shown beneath each structure.
